# Supplementary material for: Endocrine Therapy-Resistant Breast Cancer Cells Are More Sensitive to Ceramide Kinase Inhibition and Elevated Ceramide Levels Than Therapy-Sensitive Breast Cancer Cells
Source: MDPI journal article supplement (doi:10.3390/cancers14102380), 2022-05-12
Supplement: s1 [file s1]

# Supplementary Material: Endocrine Therapy-Resistant Breast Cancer Cells Are More Sensitive to Ceramide Kinase Inhibition and Elevated Ceramide Levels than Therapy-Sensitive Breast Cancer Cells

Purab Pal, Alec Millner, Svetlana E. Semina, Rosemary J. Huggins, Logan Running, Diana S. Aga, Debra A. Tonetti, Rachel Schiff, Geoffrey L. Greene, G. Ekin Atilla-Gokcumen and Jonna Frasor

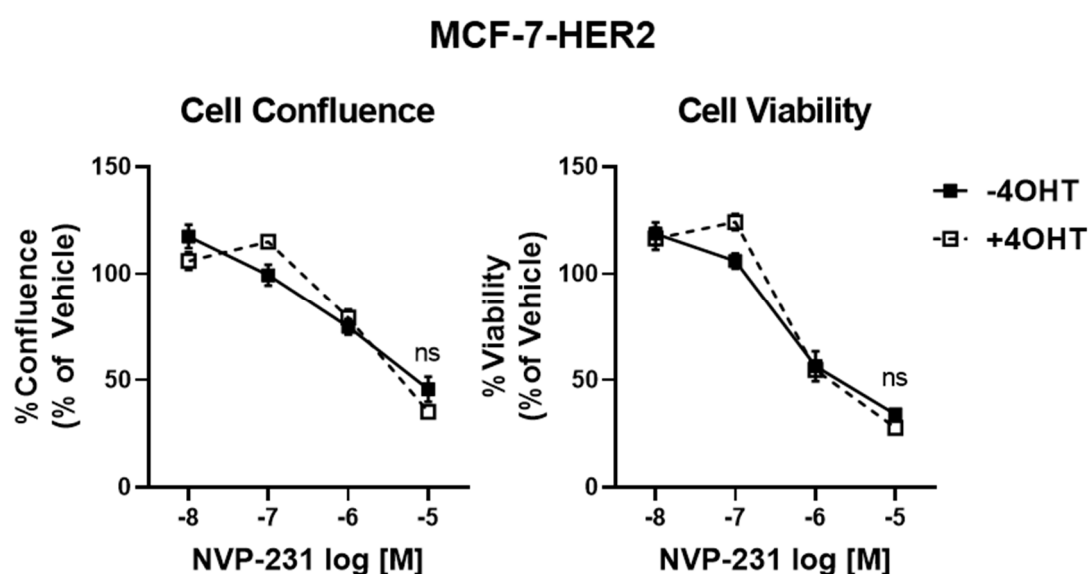

**Figure S1.** MCF-7-HER2 cells were treated with an increasing dose of NVP-231 with or without 1  $\mu$ M of 4-hydroxytamoxifen (4-OHT). After 48-h of treatment, cell confluence (brightfield) and viability (PI-negative Hoechst-positive) were estimated from Hoechst-PI endpoint assay. ns: not significant.

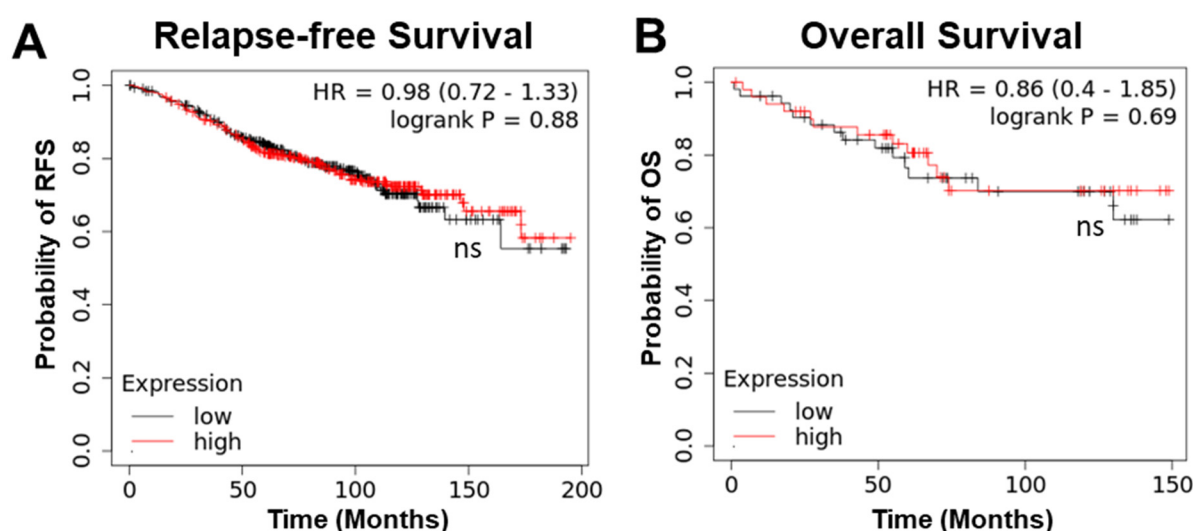

**Figure S2.** ER+ breast tumors treated with tamoxifen from publicly available datasets were analyzed for association between CERK mRNA expression and (A) relapse-free ( $n = 662$ ) or (B) overall patient survival ( $n = 104$ ). Statistical significance was determined using log-rank test. ns: not significant.

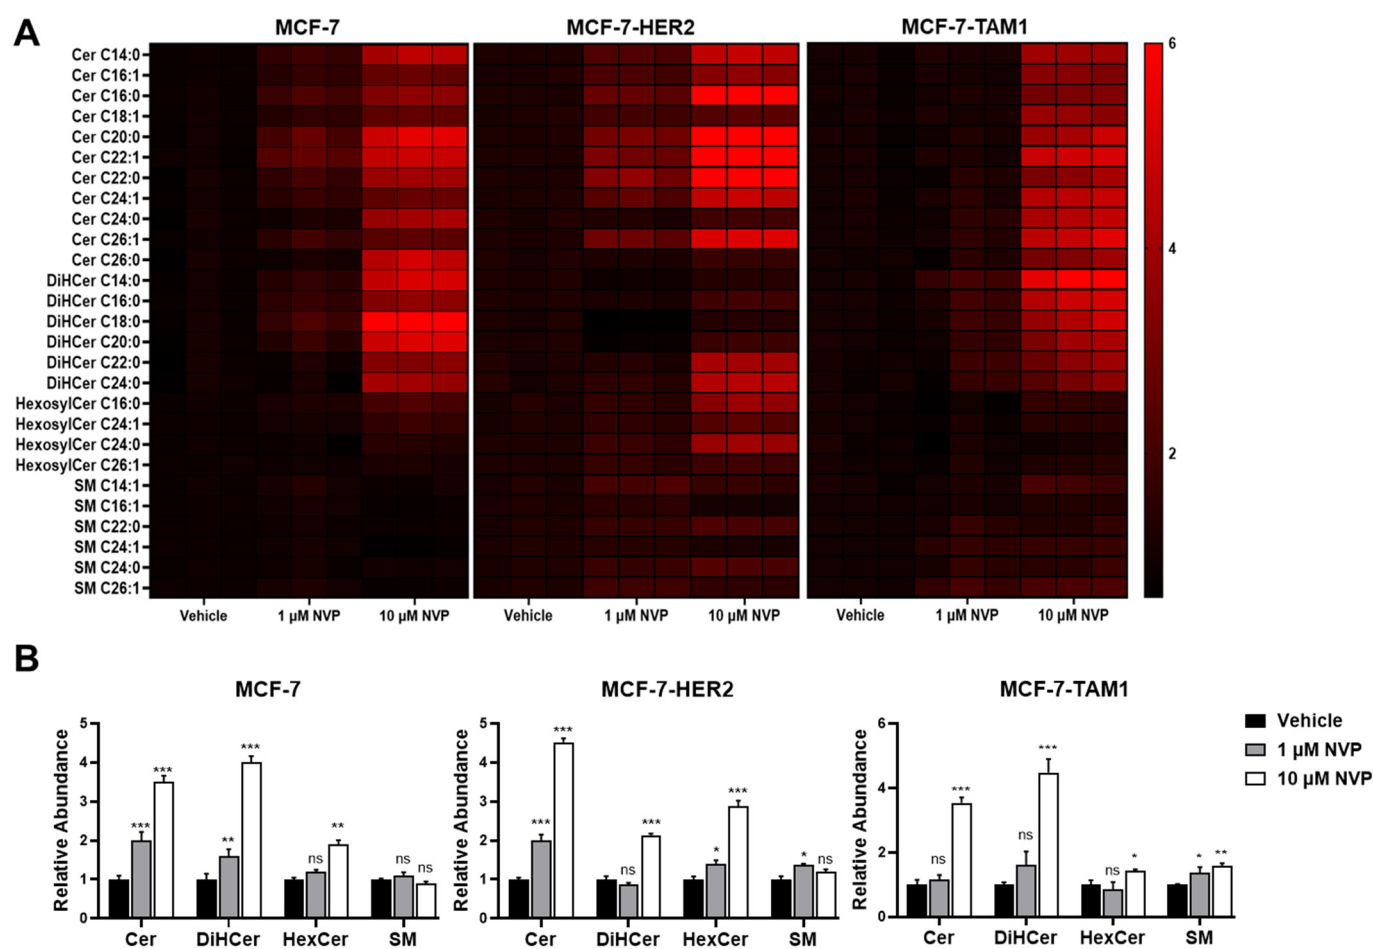

**Figure S3.** (A) MCF-7, MCF-7-HER2, MCF-7-TAM1 cells were treated with 1 and 10  $\mu$ M of NVP-231 for 48-h and relative abundance of different sphingolipid species were measured relative to respective sphingolipid species levels in vehicle-treated (DMSO) control for each cell line and presented as heatmap. (B) Abundances of ceramides, dihydroceramides, hexosylceramides, and sphingomyelins in the NVP-231 treated groups relative to vehicle-treated controls were calculated by dividing the abundance of a certain sphingolipid species by the average abundance of that species in vehicle-treated controls for each cell line. ns: not significant, \*  $p < 0.05$ , \*\*  $p < 0.01$ , \*\*\*  $p < 0.001$ .

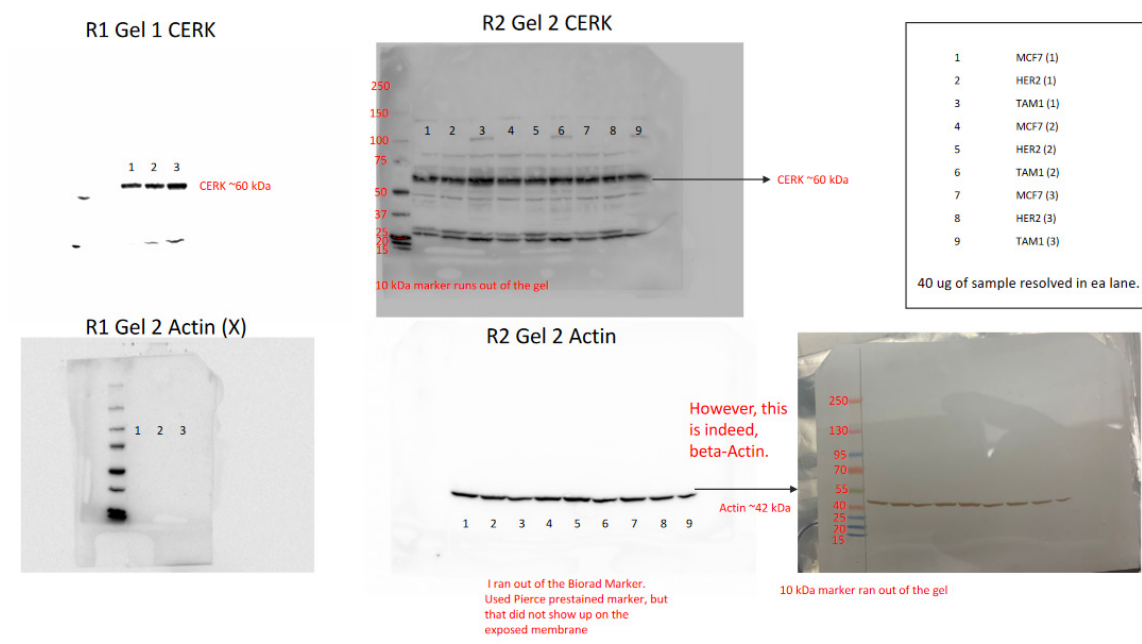

Calculated Gray Area for each set, CERK and Actin.

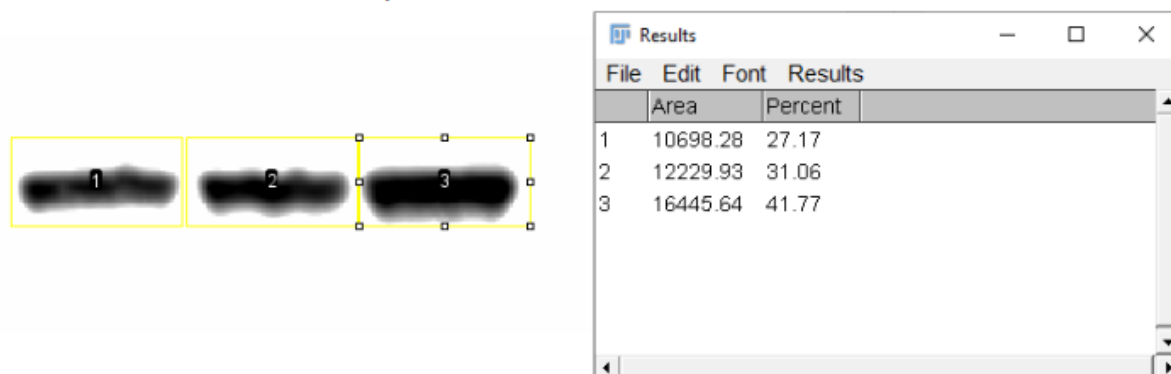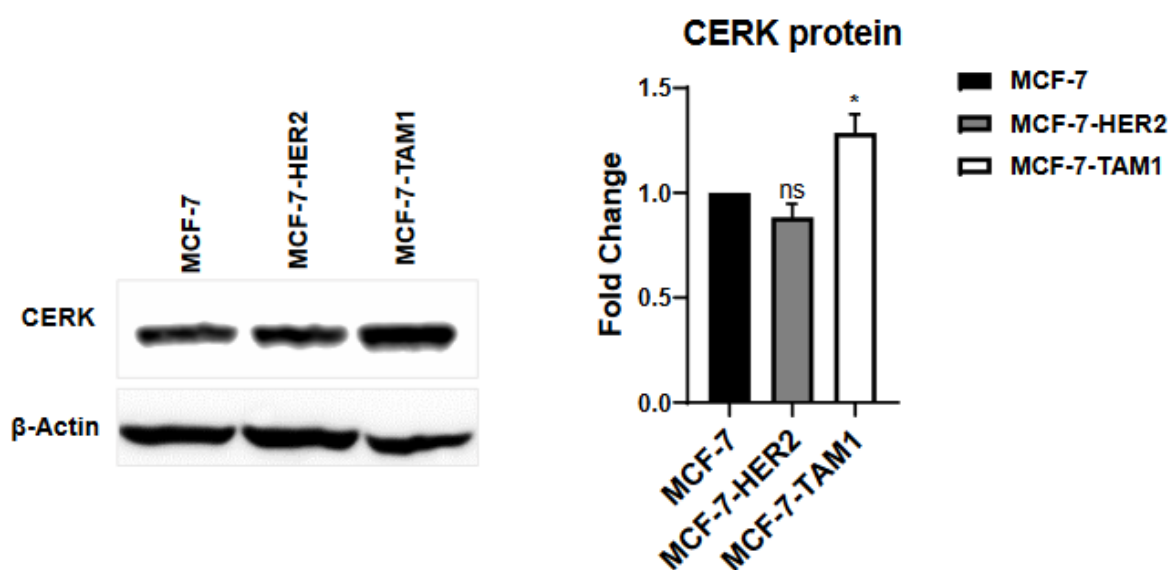

Figure S4. The uncropped Western blots.
